# Supplementary material
Source: PubMed Central journal article supplement (PMC6192613)
Supplement: supp_the2018-0033_onco12449-sup-0001-Table01.pdf [file supp_the2018-0033_onco12449-sup-0001-Table01.pdf]

Supplemental Table for:  
 Promoting Accrual of Older Patients with Cancer to Clinical Trials: An Alliance for Clinical Trials in Oncology Member Survey (A171602)  
 Rachel Freedman et al.

Table S1. Question responses by participant characteristics (n, %)

| Question (abbreviated)                                       | Gender <sup>c</sup> |              |                      | Role <sup>d</sup> |                       |                      | Age <sup>e</sup> |             |                      | Years of experience <sup>f</sup> |                  |                      | Practice Setting <sup>†</sup> |                  |               | p-value <sup>a</sup> |
|--------------------------------------------------------------|---------------------|--------------|----------------------|-------------------|-----------------------|----------------------|------------------|-------------|----------------------|----------------------------------|------------------|----------------------|-------------------------------|------------------|---------------|----------------------|
|                                                              | Female (n=772)      | Male (n=198) | p-value <sup>a</sup> | Clinician (n=429) | Non-clinician (n=505) | p-value <sup>a</sup> | ≤ 50 (N=568)     | >50 (N=403) | p-value <sup>a</sup> | ≤ 10 yrs (N=470)                 | > 10 yrs (N=426) | p-value <sup>a</sup> | Rural (n=142)                 | Suburban (n=243) | Urban (n=866) |                      |
| <b>What is the appropriate percent of enrollees age ≥65?</b> |                     |              |                      |                   |                       |                      |                  |             |                      |                                  |                  |                      |                               |                  |               |                      |
|                                                              |                     |              | <b>0.015</b>         |                   |                       | 0.090                |                  |             | 0.625                |                                  |                  | 0.385                |                               |                  |               | 0.246                |
| 25-50%                                                       | 241 (31.2)          | 65 (32.8)    |                      | 139 (32.4)        | 160 (31.7)            |                      | 180 (31.7)       | 126 (31.3)  |                      | 147 (31.3)                       | 140 (32.9)       |                      | 51 (35.9)                     | 71 (29.2)        | 160 (33.3)    |                      |
| 51-75%                                                       | 238 (30.8)          | 68 (34.3)    |                      | 151 (35.2)        | 144 (28.5)            |                      | 174 (30.6)       | 132 (32.8)  |                      | 153 (32.6)                       | 134 (31.5)       |                      | 45 (31.7)                     | 81 (33.3)        | 150 (31.2)    |                      |
| <25%                                                         | 26 (3.4)            | 8 (4.0)      |                      | 11 (2.6)          | 19 (3.8)              |                      | 19 (3.3)         | 15 (3.7)    |                      | 13 (2.8)                         | 16 (3.8)         |                      | 6 (4.2)                       | 3 (1.2)          | 19 (4.0)      |                      |
| >75%                                                         | 33 (4.3)            | 16 (8.1)     |                      | 24 (5.6)          | 24 (4.8)              |                      | 27 (4.8)         | 22 (5.5)    |                      | 19 (4.0)                         | 28 (6.6)         |                      | 8 (5.6)                       | 12 (4.9)         | 23 (4.8)      |                      |
| No target %                                                  | 210 (27.2)          | 32 (16.2)    |                      | 89 (20.7)         | 141 (27.9)            |                      | 144 (25.4)       | 99 (24.6)   |                      | 122 (26.0)                       | 93 (21.8)        |                      | 31 (21.8)                     | 63 (25.9)        | 114 (23.7)    |                      |
| Other                                                        | 24 (3.1)            | 9 (4.5)      |                      | 15 (3.5)          | 17 (3.4)              |                      | 24 (4.2)         | 9 (2.2)     |                      | 16 (3.4)                         | 15 (3.5)         |                      | 1 (0.7)                       | 13 (5.3)         | 15 (3.1)      |                      |
| <b>Need to improve elderly accrual?</b>                      |                     |              |                      |                   |                       |                      |                  |             |                      |                                  |                  |                      |                               |                  |               |                      |
|                                                              |                     |              | <b>0.0003</b>        |                   |                       | <b>&lt;0.0001</b>    |                  |             | <b>0.002</b>         |                                  |                  | <b>&lt;0.0001</b>    |                               |                  |               | 0.915                |
| Yes                                                          | 436 (56.5)          | 135 (68.2)   |                      | 313 (73.0)        | 247 (48.9)            |                      | 308 (54.2)       | 263 (65.3)  |                      | 245 (52.1)                       | 299 (70.2)       |                      | 82 (57.7)                     | 148 (60.9)       | 295 (61.3)    |                      |
| No                                                           | 45 (5.8)            | 18 (9.1)     |                      | 18 (4.2)          | 41 (8.1)              |                      | 44 (7.7)         | 19 (4.7)    |                      | 38 (8.1)                         | 22 (5.2)         |                      | 11 (7.7)                      | 14 (5.8)         | 30 (6.2)      |                      |
| Not sure                                                     | 291 (37.7)          | 45 (22.7)    |                      | 98 (22.8)         | 217 (43.0)            |                      | 216 (38.0)       | 121 (30.0)  |                      | 187 (39.8)                       | 105 (24.6)       |                      | 49 (34.5)                     | 81 (33.3)        | 156 (32.4)    |                      |
| <b>Include geriatric assessment (GA) in all trials?</b>      |                     |              |                      |                   |                       |                      |                  |             |                      |                                  |                  |                      |                               |                  |               |                      |
|                                                              |                     |              | <b>0.007</b>         |                   |                       | <b>0.026</b>         |                  |             | 0.388                |                                  |                  | 0.602                |                               |                  |               | 0.604                |
| Yes                                                          | 153 (19.8)          | 46 (23.2)    |                      | 101 (23.5)        | 92 (18.2)             |                      | 107 (18.8)       | 92 (22.8)   |                      | 98 (20.9)                        | 89 (20.9)        |                      | 29 (20.4)                     | 50 (20.6)        | 101 (21.0)    |                      |
| No                                                           | 15 (1.9)            | 10 (5.1)     |                      | 14 (3.3)          | 10 (2.0)              |                      | 13 (2.3)         | 12 (3.0)    |                      | 11 (2.3)                         | 13 (3.1)         |                      | 5 (3.5)                       | 4 (1.6)          | 14 (2.9)      |                      |
| Some trials                                                  | 444 (57.5)          | 117 (59.1)   |                      | 251 (58.5)        | 290 (57.4)            |                      | 335 (59.0)       | 227 (56.3)  |                      | 267 (56.8)                       | 256 (60.1)       |                      | 83 (58.5)                     | 146 (60.1)       | 279 (58.0)    |                      |
| Not sure                                                     | 46 (6.0)            | 2 (1.0)      |                      | 18 (4.2)          | 26 (5.1)              |                      | 26 (4.6)         | 22 (5.5)    |                      | 22 (4.7)                         | 18 (4.2)         |                      | 10 (7.0)                      | 9 (3.7)          | 20 (4.2)      |                      |
| What is GA?                                                  | 99 (12.8)           | 21 (10.6)    |                      | 39 (9.1)          | 77 (15.2)             |                      | 78 (13.7)        | 42 (10.4)   | 0.388                | 64 (13.6)                        | 42 (9.9)         |                      | 12 (8.5)                      | 28 (11.5)        | 62 (12.9)     |                      |
| Other opinion                                                | 15 (1.9)            | 2 (1.0)      |                      | 6 (1.4)           | 10 (2.0)              |                      | 9 (1.6)          | 8 (2.0)     |                      | 8 (1.7)                          | 8 (1.9)          |                      | 3 (2.1)                       | 6 (2.5)          | 5 (1.0)       |                      |
| <b>What determines "elderly"?</b>                            |                     |              |                      |                   |                       |                      |                  |             |                      |                                  |                  |                      |                               |                  |               |                      |
| ≥60                                                          | 33 (4.3)            | 4 (2.0)      | 0.140                | 10 (2.3)          | 26 (5.2)              | <b>0.026</b>         | 25 (4.4)         | 12 (3.0)    | 0.2535 <sup>1</sup>  | 31 (6.6)                         | 4 (0.9)          | <b>&lt;0.0001</b>    | 3 (2.1)                       | 7 (2.9)          | 21 (4.4)      | 0.351                |
| ≥65                                                          | 120 (15.5)          | 38 (19.2)    | 0.215                | 51 (11.9)         | 102 (20.2)            | <b>0.001</b>         | 120 (21.1)       | 38 (9.4)    | <b>&lt;0.0001</b>    | 102 (21.7)                       | 45 (10.6)        | <b>&lt;0.0001</b>    | 25 (17.6)                     | 32 (13.2)        | 83 (17.3)     | 0.325                |
| ≥70                                                          | 219 (28.4)          | 55 (27.8)    | 0.869                | 112 (26.1)        | 147 (29.1)            | 0.307                | 187 (32.9)       | 87 (21.6)   | <b>0.0001</b>        | 137 (29.2)                       | 114 (26.8)       | 0.427                | 30 (21.1)                     | 76 (31.3)        | 137 (28.5)    | 0.097                |
| ≥75                                                          | 188 (24.4)          | 43 (21.7)    | 0.437                | 96 (22.4)         | 124 (24.6)            | 0.435                | 132 (23.2)       | 100 (24.8)  | 0.571                | 105 (22.3)                       | 103 (24.2)       | 0.515                | 35 (24.7)                     | 53 (21.8)        | 115 (23.9)    | 0.766                |
| ≥80                                                          | 117 (15.2)          | 20 (10.1)    | 0.069                | 76 (17.7)         | 59 (11.7)             | <b>0.009</b>         | 60 (10.6)        | 77 (19.1)   | <b>0.0002</b>        | 51 (10.9)                        | 77 (18.1)        | <b>0.002</b>         | 24 (16.9)                     | 37 (15.2)        | 66 (13.7)     | 0.615                |
| ≥85                                                          | 40 (5.2)            | 7 (3.5)      | 0.336                | 17 (4.0)          | 28 (5.5)              | 0.261                | 29 (5.1)         | 18 (4.5)    | 0.648                | 27 (5.7)                         | 15 (3.5)         | 0.116                | 8 (5.6)                       | 13 (5.4)         | 24 (5.0)      | 0.947                |

|                                                                                            |            |            |                          |            |            |                    |            |            |                    |            |            |                    |            |            |            |                    |
|--------------------------------------------------------------------------------------------|------------|------------|--------------------------|------------|------------|--------------------|------------|------------|--------------------|------------|------------|--------------------|------------|------------|------------|--------------------|
| No preferred cut off                                                                       | 56 (7.3)   | 14 (7.1)   | 0.929                    | 41 (9.6)   | 28 (5.5)   | <b>0.010</b>       | 39 (6.9)   | 31 (7.7)   | 0.624              | 29 (6.2)   | 37 (8.7)   | 0.150              | 6 (4.2)    | 22 (9.1)   | 40 (8.3)   | 0.201              |
| Poor functional status, regardless of age                                                  | 219 (28.4) | 63 (31.8)  | 0.340                    | 153 (35.7) | 120 (23.8) | <b>&lt;0.0001</b>  | 151 (26.6) | 131 (32.5) | 0.045              | 135 (28.7) | 132 (31.0) | 0.460              | 53 (37.3)  | 78 (32.1)  | 124 (25.8) | <b>0.017</b>       |
| Other                                                                                      | 3 (0.4)    | 3 (1.5)    | <b>0.036<sup>b</sup></b> | 1 (0.2)    | 5 (1.0)    | 0.227 <sup>b</sup> | 2 (0.4)    | 4 (1.0)    | 0.519 <sup>b</sup> | 2 (0.4)    | 3 (0.7)    | 0.923 <sup>b</sup> | 0 (0.0)    | 2 (0.8)    | 4 (0.8)    | 0.592 <sup>b</sup> |
| I don't know                                                                               | 7 (0.9)    | 1 (0.5)    | 1.000 <sup>b</sup>       | 1 (0.2)    | 5 (1.0)    | 0.242 <sup>b</sup> | 4 (0.7)    | 4 (1.0)    | 0.725 <sup>b</sup> | 2 (0.4)    | 3 (0.7)    | 0.673 <sup>b</sup> | 2 (1.4)    | 1 (0.4)    | 2 (0.4)    | 0.375 <sup>b</sup> |
| <b>Barriers to enrolling older patients (top 5 ranked answers shown only)</b>              |            |            |                          |            |            |                    |            |            |                    |            |            |                    |            |            |            |                    |
| Often don't meet eligibility                                                               | 607 (78.6) | 150 (75.8) | 0.384                    | 351 (81.8) | 378 (74.9) | <b>0.010</b>       | 443 (78.0) | 314 (77.9) | 0.977              | 368 (78.3) | 337 (79.1) | 0.768              | 117 (82.4) | 195 (80.3) | 377 (78.4) | 0.553              |
| Regimens too toxic                                                                         | 407 (52.7) | 91 (46.0)  | 0.090                    | 213 (49.7) | 263 (52.1) | 0.459              | 290 (51.1) | 209 (51.9) | 0.805              | 238 (50.6) | 225 (52.8) | 0.515              | 79 (55.6)  | 136 (56.0) | 238 (49.5) | 0.176              |
| Long distance, transportation, time                                                        | 397 (51.4) | 96 (48.9)  | 0.460                    | 214 (49.9) | 266 (52.7) | 0.395              | 293 (51.6) | 200 (49.6) | 0.548              | 256 (54.5) | 208 (48.8) | 0.091              | 70 (49.3)  | 98 (40.3)  | 285 (59.3) | <b>&lt;0.0001</b>  |
| Patient and/or family preferences                                                          | 315 (40.8) | 79 (39.9)  | <b>0.001</b>             | 196 (45.7) | 181 (35.8) | <b>0.002</b>       | 213 (37.5) | 181 (44.9) | <b>0.021</b>       | 173 (36.8) | 193 (45.3) | <b>0.010</b>       | 57 (40.1)  | 108 (44.4) | 192 (39.9) | 0.485              |
| Concern for limited life expectancy                                                        | 250 (32.4) | 59 (29.8)  | 0.486                    | 123 (28.7) | 172 (34.1) | 0.078              | 201 (35.4) | 109 (27.1) | <b>0.006</b>       | 160 (34.0) | 118 (27.7) | <b>0.040</b>       | 34 (23.9)  | 83 (34.2)  | 153 (31.8) | 0.102              |
| <b>Strategies to improve accrual of elderly patients (top 5 ranked answers shown only)</b> |            |            |                          |            |            |                    |            |            |                    |            |            |                    |            |            |            |                    |
| More dedicated trials                                                                      | 330 (42.8) | 86 (43.4)  | 0.861                    | 207 (48.3) | 198 (39.2) | <b>0.005</b>       | 231 (40.7) | 185 (19.1) | 0.104              | 182 (38.7) | 209 (49.1) | <b>0.002</b>       | 73 (51.4)  | 120 (49.4) | 186 (38.7) | <b>0.003</b>       |
| Minimize exclusion criteria                                                                | 315 (40.8) | 92 (46.5)  | 0.150                    | 192 (44.8) | 200 (39.6) | 0.112              | 251 (44.2) | 156 (38.7) | 0.088              | 193 (41.1) | 188 (44.1) | 0.354              | 74 (52.1)  | 99 (40.7)  | 196 (40.8) | <b>0.043</b>       |
| Consider distinct strategies for those aged ≥65 and ≥70                                    | 307 (39.8) | 73 (36.9)  | 0.456                    | 187 (43.6) | 181 (35.8) | <b>0.016</b>       | 207 (36.4) | 173 (42.9) | 0.041              | 172 (36.6) | 182 (42.7) | 0.061              | 59 (41.6)  | 101 (41.6) | 185 (38.5) | 0.652              |
| All trials have a specific "expansion cohort" of older patients                            | 276 (35.8) | 67 (33.8)  | 0.616                    | 161 (37.5) | 169 (33.5) | 0.195              | 199 (35.0) | 145 (36.0) | 0.762              | 166 (35.3) | 152 (35.7) | 0.910              | 45 (31.7)  | 75 (30.9)  | 185 (38.5) | 0.082              |

|                                       |            |           |       |           |            |              |            |            |       |            |            |       |           |           |            |       |
|---------------------------------------|------------|-----------|-------|-----------|------------|--------------|------------|------------|-------|------------|------------|-------|-----------|-----------|------------|-------|
| Standardized educational intervention | 210 (27.2) | 45 (22.7) | 0.202 | 93 (21.7) | 152 (30.1) | <b>0.004</b> | 148 (26.1) | 108 (26.8) | 0.796 | 126 (26.8) | 104 (24.4) | 0.412 | 33 (23.2) | 60 (24.7) | 128 (26.6) | 0.678 |
|---------------------------------------|------------|-----------|-------|-----------|------------|--------------|------------|------------|-------|------------|------------|-------|-----------|-----------|------------|-------|

---

<sup>a</sup> by chi-square testing except when specified. Significant results (p<0.0001) are bolded.

<sup>b</sup> by Fisher's Exact testing. Significant results (p<0.0001) are bolded.

<sup>c</sup> only included those answering gender female or male (n=971)

<sup>d</sup> For this analysis we only included the 934 participants who answered this question. A respondent was deemed a "Clinician" if they marked any of the following choices: medical oncologist, nurse/NP, pathologist, radiation oncologist, radiologist, surgeon. Respondents marked anything else were deemed as a "Non-Clinician."

<sup>e</sup> only included those answering age (n=971)

<sup>f</sup> only included those answering years of experience and not 'not applicable' (i.e. I am a patient, etc.) (n=896)

<sup>g</sup> only included those answering practice setting (n=932)
